# Supplementary material for: Substantial Improvement of Color-Rendering Properties of Conventional White LEDs Using Remote-Type Red Quantum-Dot Caps
Source: MDPI journal article supplement (doi:10.3390/nano12071097), 2022-03-27
Supplement: s1 [file s1]

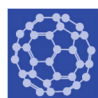

# Substantial Improvement of Color-Rendering Properties of Conventional White LEDs Using Remote-Type Red Quantum-Dot Caps

Gi Jung Lee <sup>1</sup>, Seung Chan Hong <sup>1</sup>, Jung-Gyun Lee <sup>1</sup>, Jae-Hyeon Ko <sup>1,\*</sup>, Taehee Park <sup>2</sup>, Young Wook Ko <sup>2</sup>, and Sergey Lushnikov <sup>3</sup>

**Table S1.** Simulation parameters of the QD-applied white LED lighting.

|                  | Lighting Frame                                                                                                | Diffuser plate                                     | Quantum dot cap                                                                                                |
|------------------|---------------------------------------------------------------------------------------------------------------|----------------------------------------------------|----------------------------------------------------------------------------------------------------------------|
| Diameter (mm)    | 182                                                                                                           | 146                                                | Outer wall: $7.4 \times 5.3 \times 4.2$<br>Attachment side: $5.6 \times 3.4$<br>Opening side: $5.6 \times 1.7$ |
| Thickness (mm)   | 28 (Height)                                                                                                   | 2                                                  | Attachment side: $1.8 \times 0.9$<br>Opening side: $1.8 \times 1.2$                                            |
| Material         | PMMA ( $n = 1.4936$ )                                                                                         | Polycarbonate & $\text{TiO}_2$<br>( $n = 2.4358$ ) | PDMS &<br>Red quantum dot ( $n = 1.43$ )                                                                       |
| Optical property | Inner side reflectance: 76%<br>Inclination angle of the inner side: $126^\circ$<br>PCB board reflectance: 69% | Optical smoothing<br>(Fresnel loss)                | Optical smoothing<br>(Fresnel loss)                                                                            |

**Table S2.** Simulation parameters of white LEDs included in the lighting model.

| White LEDs               |                                                         |      |      |      |      |
|--------------------------|---------------------------------------------------------|------|------|------|------|
| Array radius (mm)        | 10                                                      | 17.1 | 24.2 | 31.3 | 38.4 |
| Number of LEDs           | 3                                                       | 8    | 12   | 21   | 28   |
| Radiant Flux (w) per LED | 0.5 (154.25 lm)                                         |      |      |      |      |
| LED dimensions (mm)      | 2.8 (length) $\times$ 3.2 (width) $\times$ 0.7 (height) |      |      |      |      |
| CRI (Ra)                 | 82.9                                                    |      |      |      |      |
| CCT(k)                   | 5382                                                    |      |      |      |      |

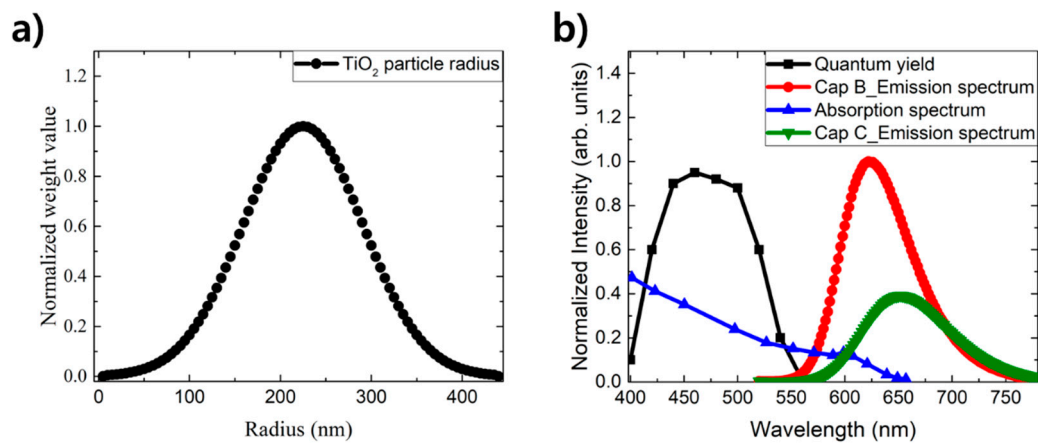

**Figure S1.** Simulation conditions: (a) the size distribution of the  $\text{TiO}_2$  particles in the diffuser plate, and (b) the quantum yield, the absorption spectrum and two emission spectra.

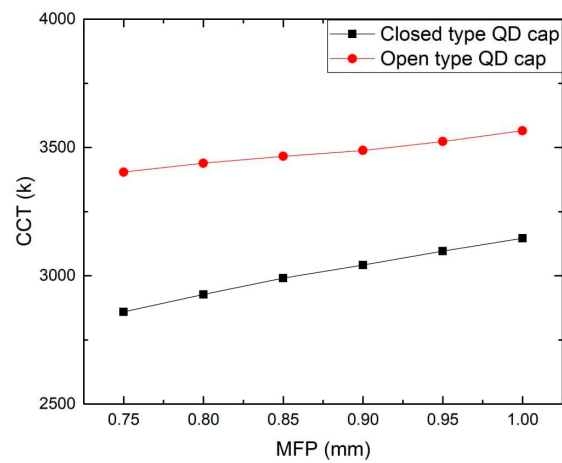

(a)

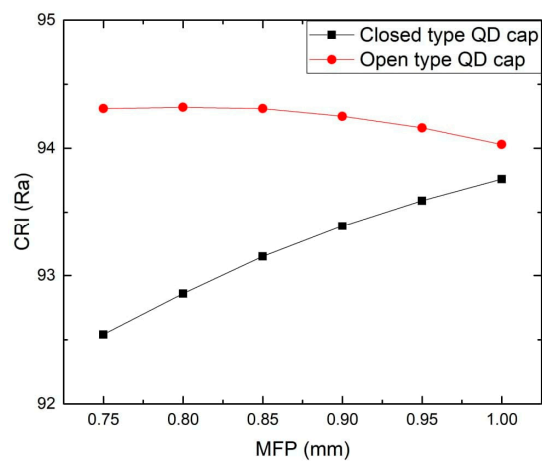

(b)

**Figure S2.** Simulation results for the dependence of (a) the CCT and (b) the CRI on the MFP of red QDs in the cap.

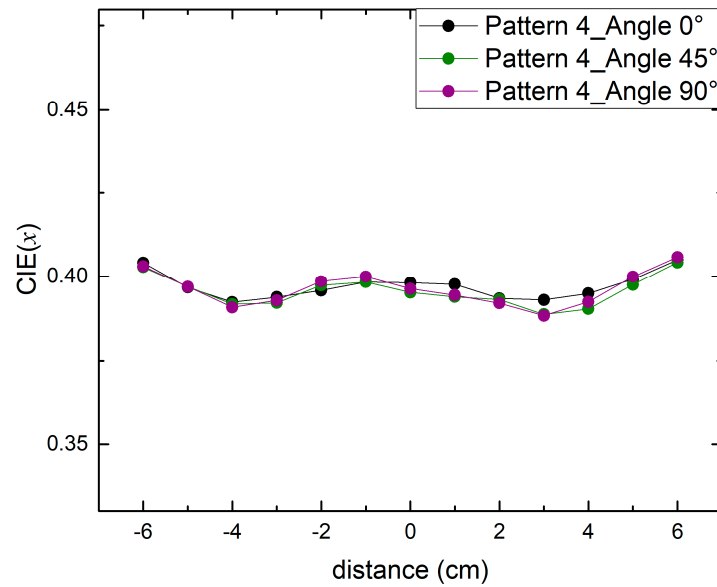

(a)

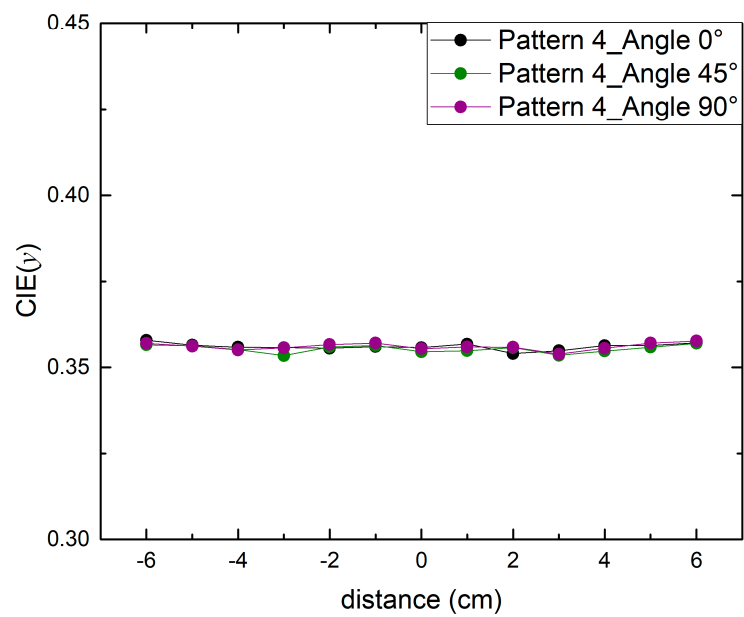

(b)

**Figure S3.** The positional dependence of the color coordinates ( $x, y$ ) of the QD lighting adopting the pattern 4 measured along the horizontal ( $0^\circ$ ), diagonal ( $45^\circ$ ), and vertical ( $90^\circ$ ) directions. The sub-figures (a) and (b) are for the color coordinates  $x$  and  $y$ , respectively.

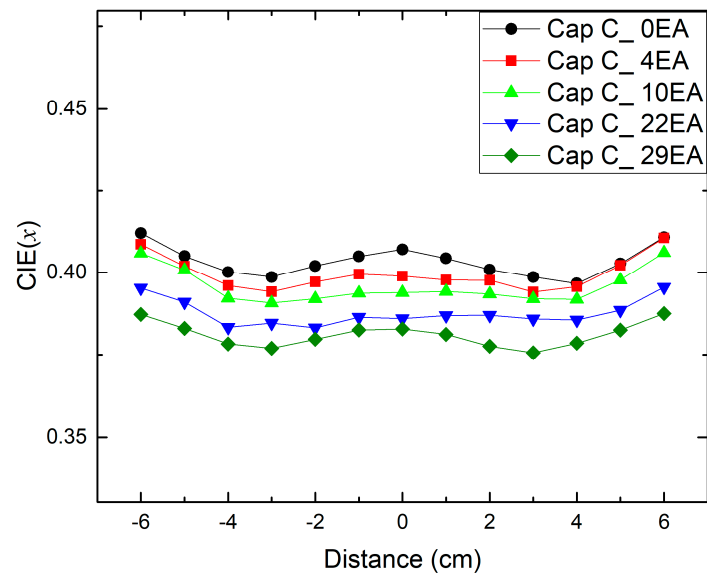

(a)

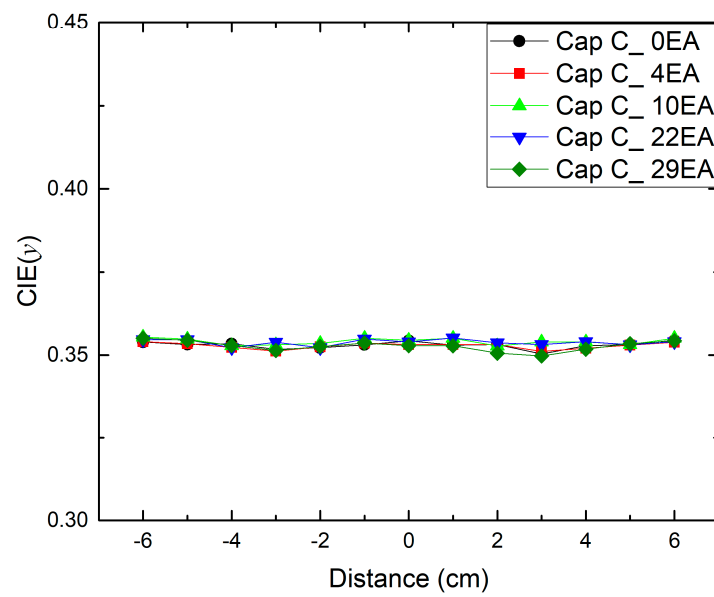

(b)

**Figure S4.** The positional dependence of the color coordinates ( $x$ ,  $y$ ) of the QD lighting for all investigated configurations along the horizontal direction. The subfigures (a) and (b) are for the color coordinates  $x$  and  $y$ , respectively.

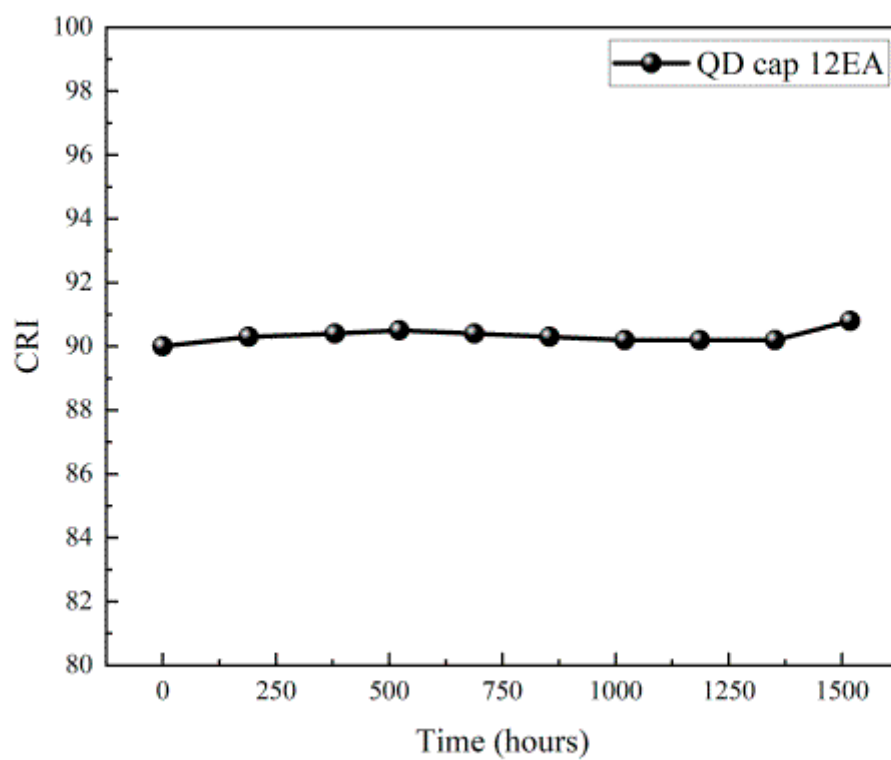

**Figure S5.** The dependence of CRI on the aging time.
